# Supplementary material
Source: Springer Nature journal article supplement (https://www.springermedizin.de/resource/supplementary/12967_2011_692_MOESM4_ESM.pdf/9577292)

# Transfection of miRNA Inhibitor/ miRNA Mimics - Hypoxia

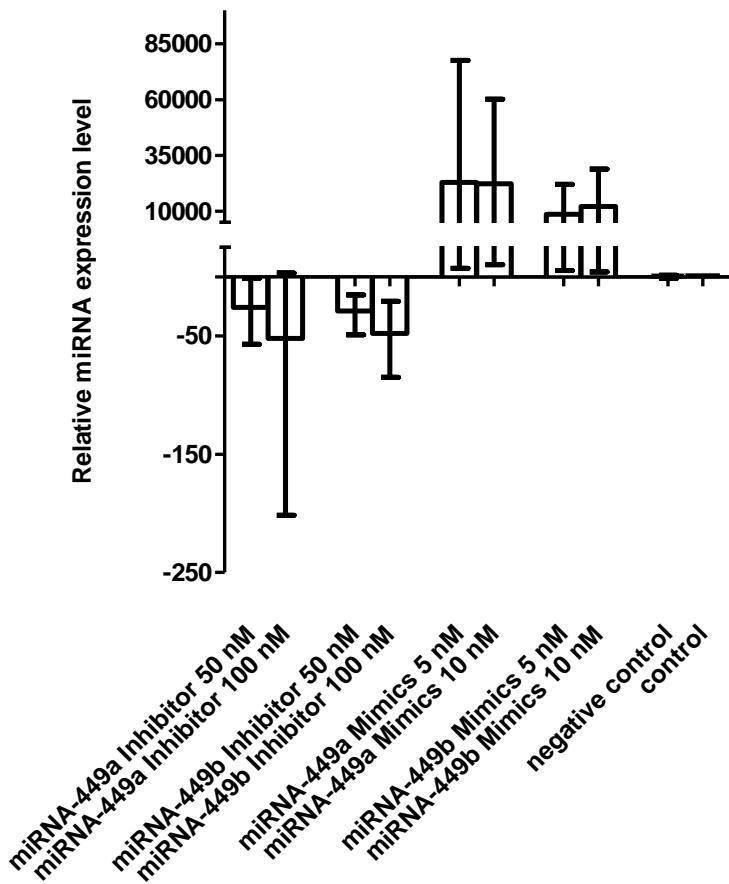

Supplement: MOESM4 [file 9577292]
